# Supplementary material for: Social disadvantages associated with myasthenia gravis and its treatment: a multicentre cross-sectional study
Source: PubMed Central journal article supplement — BMJ Open. 2017 Feb 23;7(2):e013278. doi: 10.1136/bmjopen-2016-013278 (PMC5337722; doi:10.1136/bmjopen-2016-013278), 2017-02-23
Supplement: bmjopen-2016-013278supp_table1.pdf [file bmjopen-2016-013278supp_table1.pdf]

**Supplementary Table 1.** Institutions participating in the Japan MG Registry Study

2015

---

---

Department of Neurology, Sapporo Medical University Hospital, Sapporo

Department of Neurology, Hokkaido Medical Center, Sapporo

Department of Neurology, Hanamaki General Hospital, Hanamaki

Department of Neurology, Sendai Medical Center, Sendai

Department of Neurology, Tohoku University Graduate School of Medicine, Sendai

Chiba Neurology Clinic, Chiba

Department of Neurology, Chiba University School of Medicine, Chiba

Department of Neurology, Tokyo Medical University, Tokyo

Department of Neurology, Toho University Medical Center Oh-hashii Hospital, Tokyo

Department of Neurology, Tokyo Women's Medical University, Tokyo

Department of Neurology, Kinki University School of Medicine, Osaka

Department of Neurological Therapeutics, Kyushu University Graduate School of

Medicine, Fukuoka

Department of Neurology, Nagasaki University Hospital, Nagasaki

---

---

MG, myasthenia gravis
