# Supplementary material for: Social disadvantages associated with myasthenia gravis and its treatment: a multicentre cross-sectional study
Source: PubMed Central journal article supplement — BMJ Open. 2017 Feb 23;7(2):e013278. doi: 10.1136/bmjopen-2016-013278 (PMC5337722; doi:10.1136/bmjopen-2016-013278), 2017-02-23
Supplement: bmjopen-2016-013278supp_table2.pdf [file bmjopen-2016-013278supp_table2.pdf]

**Supplementary Table 2.** Multivariate logistic regression analysis with question items to social disadvantages

| Question item                                                                                                   | Odds ratio (95%CI), p-value                        |                                     |                                           |
|-----------------------------------------------------------------------------------------------------------------|----------------------------------------------------|-------------------------------------|-------------------------------------------|
|                                                                                                                 | Unemployment or unwilling transfer (213/486 cases) | Decrease in income (244/486 cases)  | Reduced social positivity (449/486 cases) |
| 1. Insufficient control of symptoms                                                                             | <b>1.35 (1.11-1.64), 0.0028</b>                    | 1.08 (0.89-1.32), 0.44              | 1.12 (0.92-1.36), 0.26                    |
| 2. Depressive state, changes in mood or character after PSL (PSL use, 81% of subjects)                          | 1.05 (0.81-1.36), 0.72                             | 1.02 (0.78-1.34), 0.86              | 1.17 (0.86-1.58), 0.32                    |
| 3. Changes in appearance after PSL (PSL use, 81% of 486 subjects)                                               | 0.98 (0.79-1.22), 0.86                             | 0.91 (0.73-1.15), 0.44              | <b>1.35 (1.04-1.75), 0.026</b>            |
| 4. Diabetes mellitus, osteoporosis, cataracta and/or other arteriosclerotic diseases (PSL use, 81% of subjects) | 0.97 (0.75-1.26), 0.83                             | <b>1.34 (1.01-1.79), 0.044</b>      | 1.08 (0.79-1.49), 0.62                    |
| 5. Side effects related to non-steroid immunosuppressive agents (CNI use, 53%; AZA use, 5%)                     | 0.86 (0.61-1.22), 0.39                             | 1.03 (0.72-1.48), 0.86              | 1.17 (0.75-1.83), 0.48                    |
| 6. Adverse events related to plasmapheresis (28%)                                                               | 0.90 (0.50-1.65), 0.74                             | 0.74 (0.39-1.41), 0.36              | 1.08 (0.53-2.22), 0.83                    |
| 7. Adverse events related to intravenous immunoglobulin (16%)                                                   | 1.14 (0.57-2.28), 0.72                             | 1.95 (0.71-5.36), 0.19              | 1.37 (0.49-3.84), 0.55                    |
| 8. Long-term (>1 month) hospital stay                                                                           | <b>1.26 (1.06-1.51), 0.0093</b>                    | <b>1.58 (1.30-1.91), &lt;0.0001</b> | 0.79 (0.65-0.95), 0.013                   |
| 9. Short-term (≤1 week) hospital stay                                                                           | 1.26 (0.90-1.76), 0.17                             | 1.20 (0.83-1.72), 0.33              | 1.42 (0.97-2.08), 0.07                    |
| 10. Need to go to the hospital for years                                                                        | <b>1.34 (1.04-1.73), 0.023</b>                     | 1.17 (0.90-1.51), 0.25              | 0.79 (0.61-1.02), 0.069                   |
| 11. Need to take various oral drugs for years                                                                   | 0.77 (0.58-1.02), 0.068                            | 0.91 (0.68-1.22), 0.52              | 1.14 (0.84-1.55), 0.39                    |
| 12. Bias for intractable and uncommon diseases from others                                                      | <b>1.32 (1.06-1.65), 0.014</b>                     | 0.89 (0.71-1.11), 0.30              | <b>1.51 (1.16-1.98), 0.0023</b>           |

Significant correlations are indicated bold font. AZA, azathioprine; CI, confidence interval; CNI, calcineurin inhibitor; PSL, prednisolone.
