# Supplementary material for: Social disadvantages associated with myasthenia gravis and its treatment: a multicentre cross-sectional study
Source: PubMed Central journal article supplement — BMJ Open. 2017 Feb 23;7(2):e013278. doi: 10.1136/bmjopen-2016-013278 (PMC5337722; doi:10.1136/bmjopen-2016-013278), 2017-02-23
Supplement: bmjopen-2016-013278supp_table3.pdf [file bmjopen-2016-013278supp_table3.pdf]

**Supplementary Table 3.** Multivariate logistic regression analysis with clinical factors to social disadvantages

| Clinical factor                                     | Odds ratio (95%CI), p-value                        |                                    |                                           |
|-----------------------------------------------------|----------------------------------------------------|------------------------------------|-------------------------------------------|
|                                                     | Unemployment or unwilling transfer (213/680 cases) | Decrease in income (244/680 cases) | Reduced social positivity (449/917 cases) |
| Age, yrs                                            | 6.82 (0.73-64.07), 0.093                           | 0.68 (0.11-4.26), 0.68             | 0.23 (0.03-1.68), 0.15                    |
| Female (%)                                          | 0.87 (0.26-2.86), 0.82                             | 0.49 (0.15-1.54), 0.22             | 1.91 (0.57-6.36), 0.29                    |
| Time since onset, yrs                               | 0.14 (0.01-1.36), 0.090                            | 1.40 (0.22-8.98), 0.72             | 4.48 (0.60-33.72), 0.15                   |
| Age at onset, yrs                                   | 0.15 (0.02-1.39), 0.094                            | 1.49 (0.23-9.50), 0.67             | 4.50 (0.60-33.61), 0.14                   |
| Thymectomy, %                                       | <b>16.98 (1.02-282.51), 0.048</b>                  | <b>9.79 (1.10-86.92), 0.041</b>    | 0.91 (0.11-7.30), 0.93                    |
| Thymoma, %                                          | 0.62 (0.15-2.52), 0.51                             | 0.83 (0.22-3.22), 0.79             | 0.33 (0.08-1.43), 0.14                    |
| AChR-Ab-positivity, %                               | 0.28 (0.04-1.79), 0.18                             | 0.27 (0.05-1.42), 0.12             | 1.26 (0.24-6.60), 0.78                    |
| MuSK-Ab-positivity, %                               | 13.13 (0.06-3071.64), 0.35                         | 0.66 (0.02-24.06), 0.82            | 0.10 (0.00-3.69), 0.21                    |
| MGFA classification (Worst)                         | 1.15 (0.62-2.14), 0.65                             | 0.90 (0.51-1.61), 0.73             | <b>2.26 (1.16-4.41), 0.017</b>            |
| Bulbar symptoms, % (Worst)                          | 0.88 (0.17-4.50), 0.88                             | 1.08 (0.22-5.18), 0.92             | 0.38 (0.08-1.87), 0.23                    |
| Current MGC                                         | 1.15 (1.00-1.34), 0.057                            | 1.16 (0.99-1.35), 0.063            | 1.17 (0.98-1.39), 0.08                    |
| Peak dose of PSL, mg/day                            | 1.01 (0.97-1.05), 0.63                             | 1.02 (0.99-1.06), 0.22             | 0.99 (0.95-1.02), 0.44                    |
| Duration of PSL $\geq$ 20 mg/day, yrs               | 1.19 (0.80-1.75), 0.39                             | 1.30 (0.86-1.94), 0.21             | 0.73 (0.49-1.10), 0.14                    |
| Current dose of PSL, mg/day                         | 1.17 (0.99-1.39), 0.062                            | 1.04 (0.92-1.19), 0.53             | 1.03 (0.91-1.17), 0.64                    |
| MM or better with 5 mg at 1 year into treatment, %  | 0.65 (0.11-3.90), 0.64                             | 1.03 (0.20-5.34), 0.98             | 0.66 (0.13-3.46), 0.63                    |
| MM or better with 5 mg at 2 years into treatment, % | 1.49 (0.28-7.98), 0.64                             | 3.72 (0.73-19.02), 0.11            | 3.17 (0.50-19.92), 0.22                   |
| MM or better with 5 mg at 4 years into treatment, % | 2.05 (0.37-11.22), 0.41                            | 0.55 (0.12-2.65), 0.46             | <b>0.16 (0.03-0.98), 0.048</b>            |
| MM or better with 5 mg at present, %                | 1.29 (0.28-6.00), 0.74                             | 1.72 (0.39-7.52), 0.47             | 0.73 (0.18-2.93), 0.66                    |

Significant correlations are indicated bold font. AChR-Ab, antiacetylcholine receptor antibody; CI, confidence interval; MGC, Myasthenia Gravis Composite; MG, myasthenia gravis; MGFA, Myasthenia Gravis Foundation of America; MG-QOL15, 15-item MG-specific quality of life scale; MG-QOL15-J, Japanese version of the MG-QOL15; MM, minimal manifestations; MuSK-Ab, muscle-specific kinase antibody; PSL, prednisolone; QMG, MGFA quantitative MG score.
